# Supplementary material
Source: PubMed Central journal article supplement (PMC1635401)
Supplement: mbc_E06-04-0306_7.pdf [file mbc_E06-04-0306_7.pdf]

**A****PDGF $\beta$ R****Rab 11-EGFP****merge****wt  
+PDGF-BB  
20 min**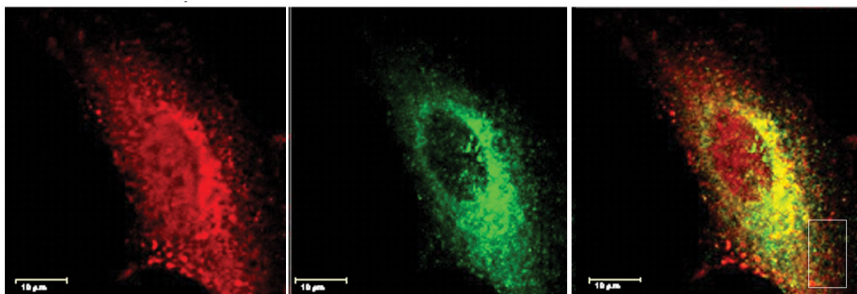**B****PDGF $\beta$ R****Rab 11-EGFP****merge****TC-PTP ko  
+ PDGF-BB  
20 min**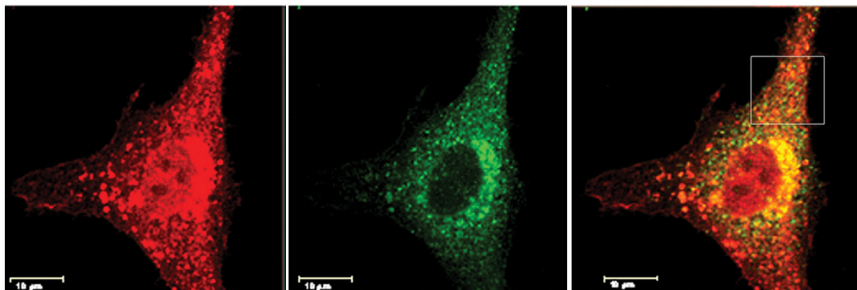**Supplementary Figure S7**
