# Supplementary material
Source: PubMed Central journal article supplement (PMC1635401)

**A**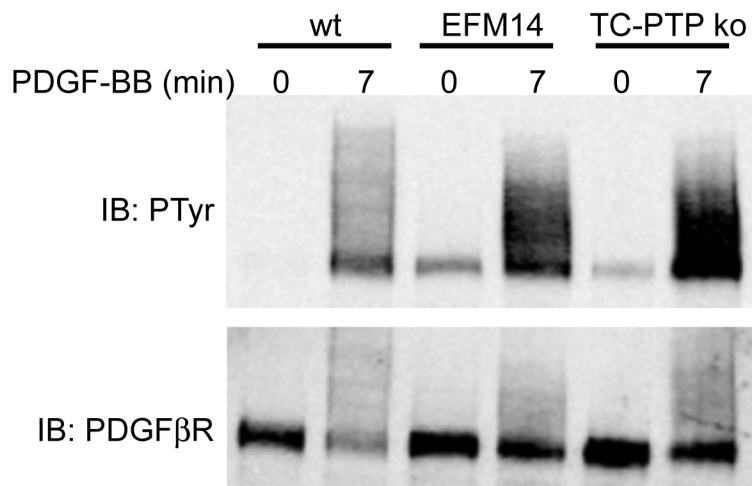**B**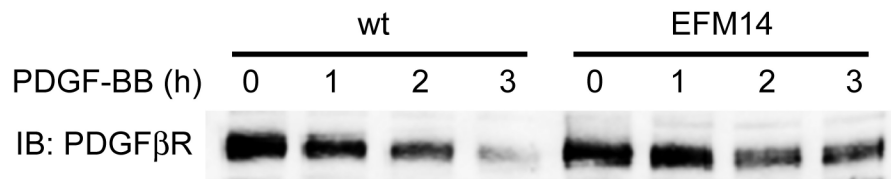**C**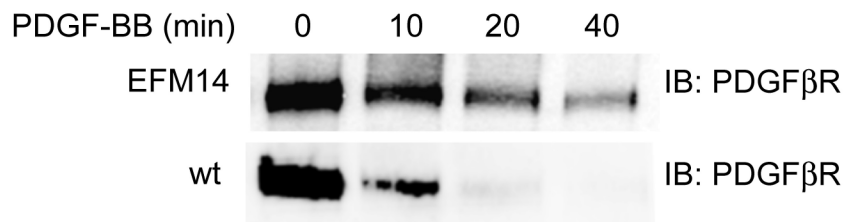

Supplementary Figure S1

Supplement: mbc_E06-04-0306_1.pdf [file mbc_E06-04-0306_1.pdf]

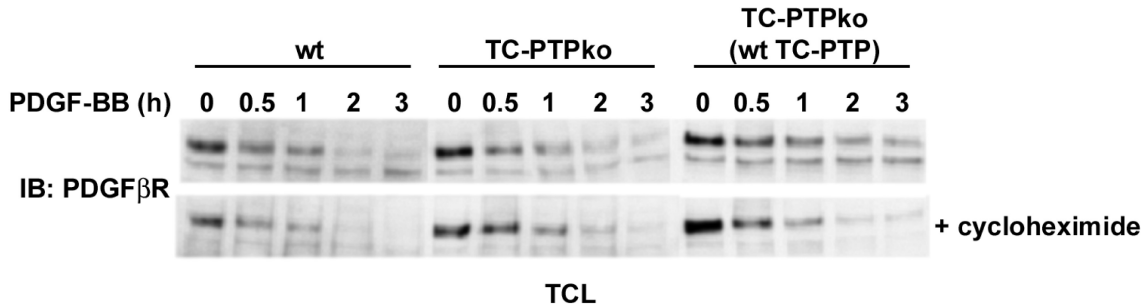

Supplementary Figure S2

Supplement: mbc_E06-04-0306_2.pdf [file mbc_E06-04-0306_2.pdf]

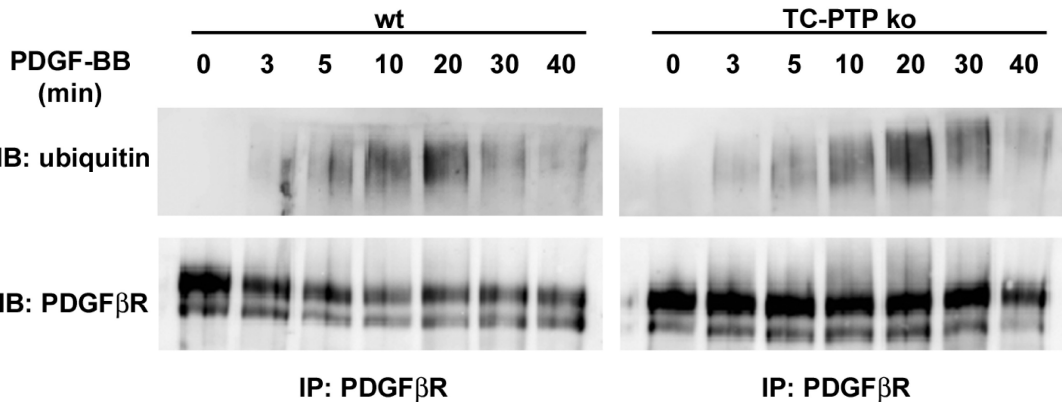

Supplementary Figure S3

Supplement: mbc_E06-04-0306_3.pdf [file mbc_E06-04-0306_3.pdf]

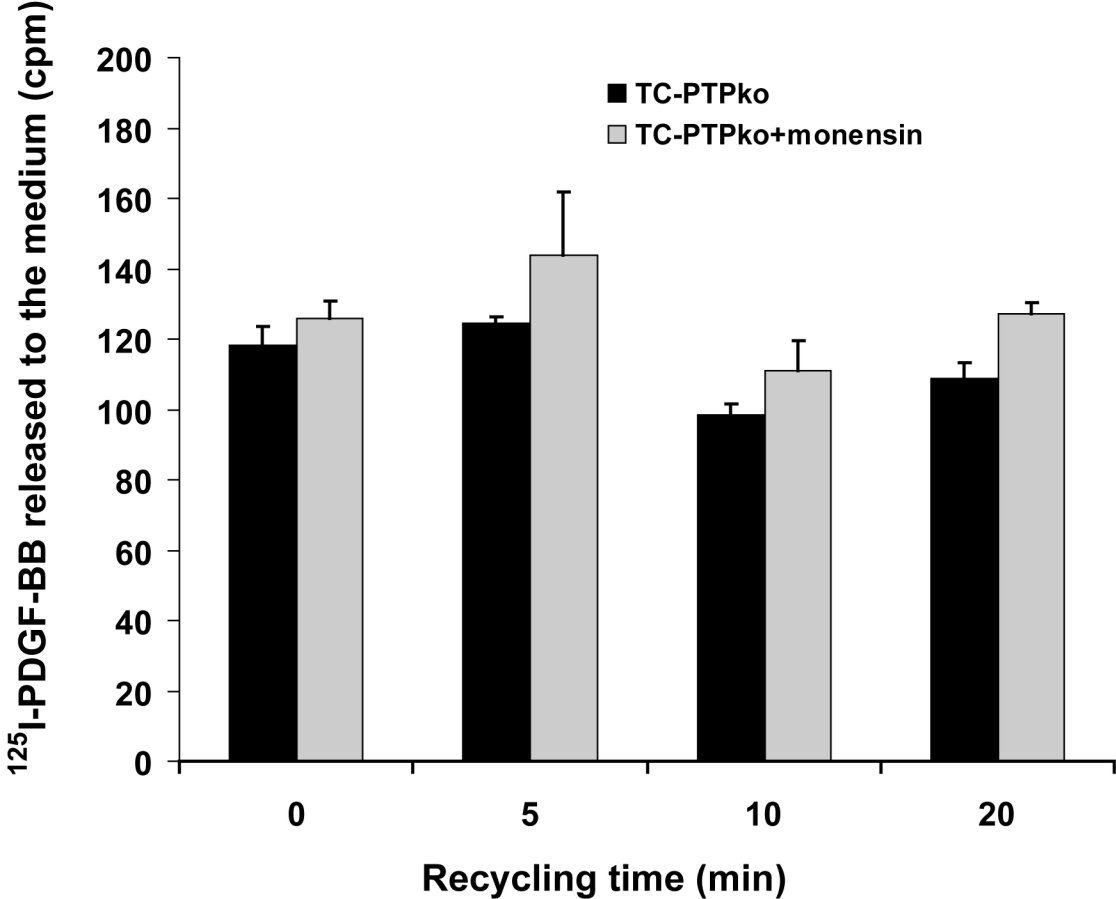

Supplementary Figure S4

Supplement: mbc_E06-04-0306_4.pdf [file mbc_E06-04-0306_4.pdf]

A

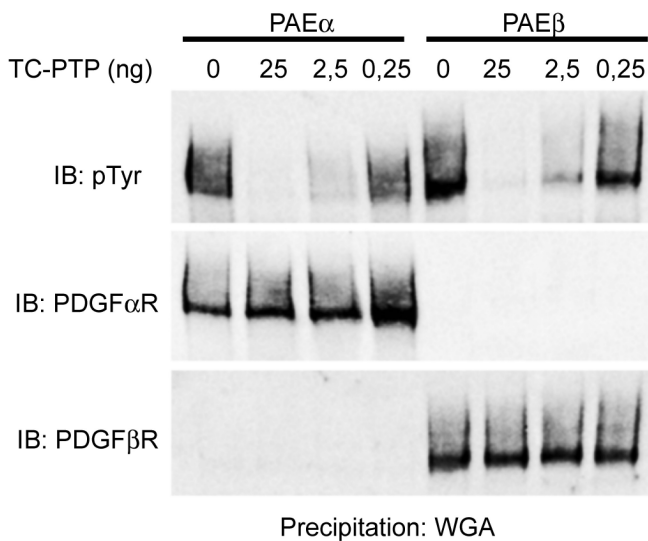

B

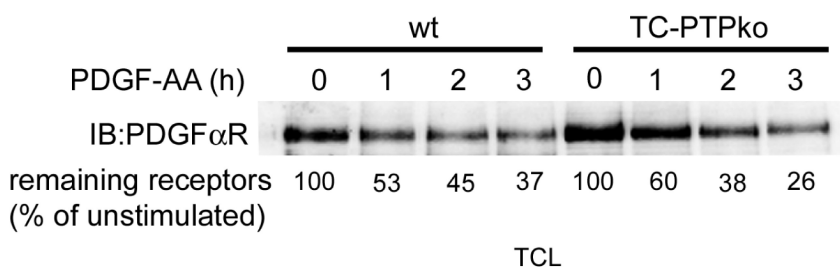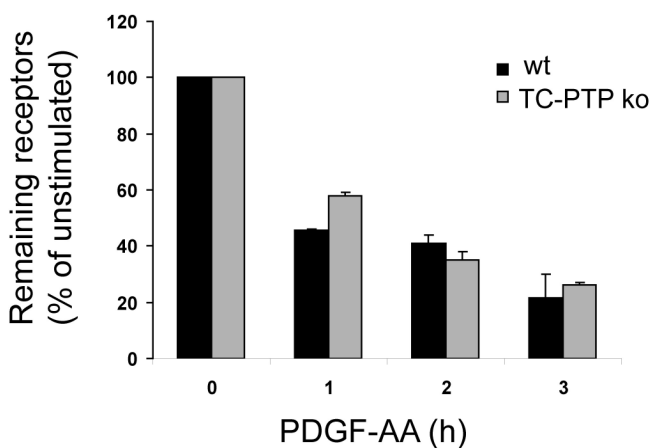

C

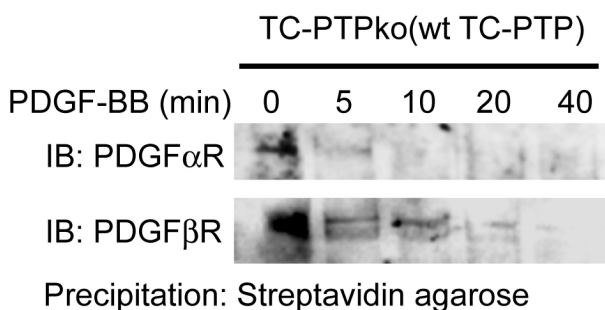

Supplement: mbc_E06-04-0306_5.pdf [file mbc_E06-04-0306_5.pdf]

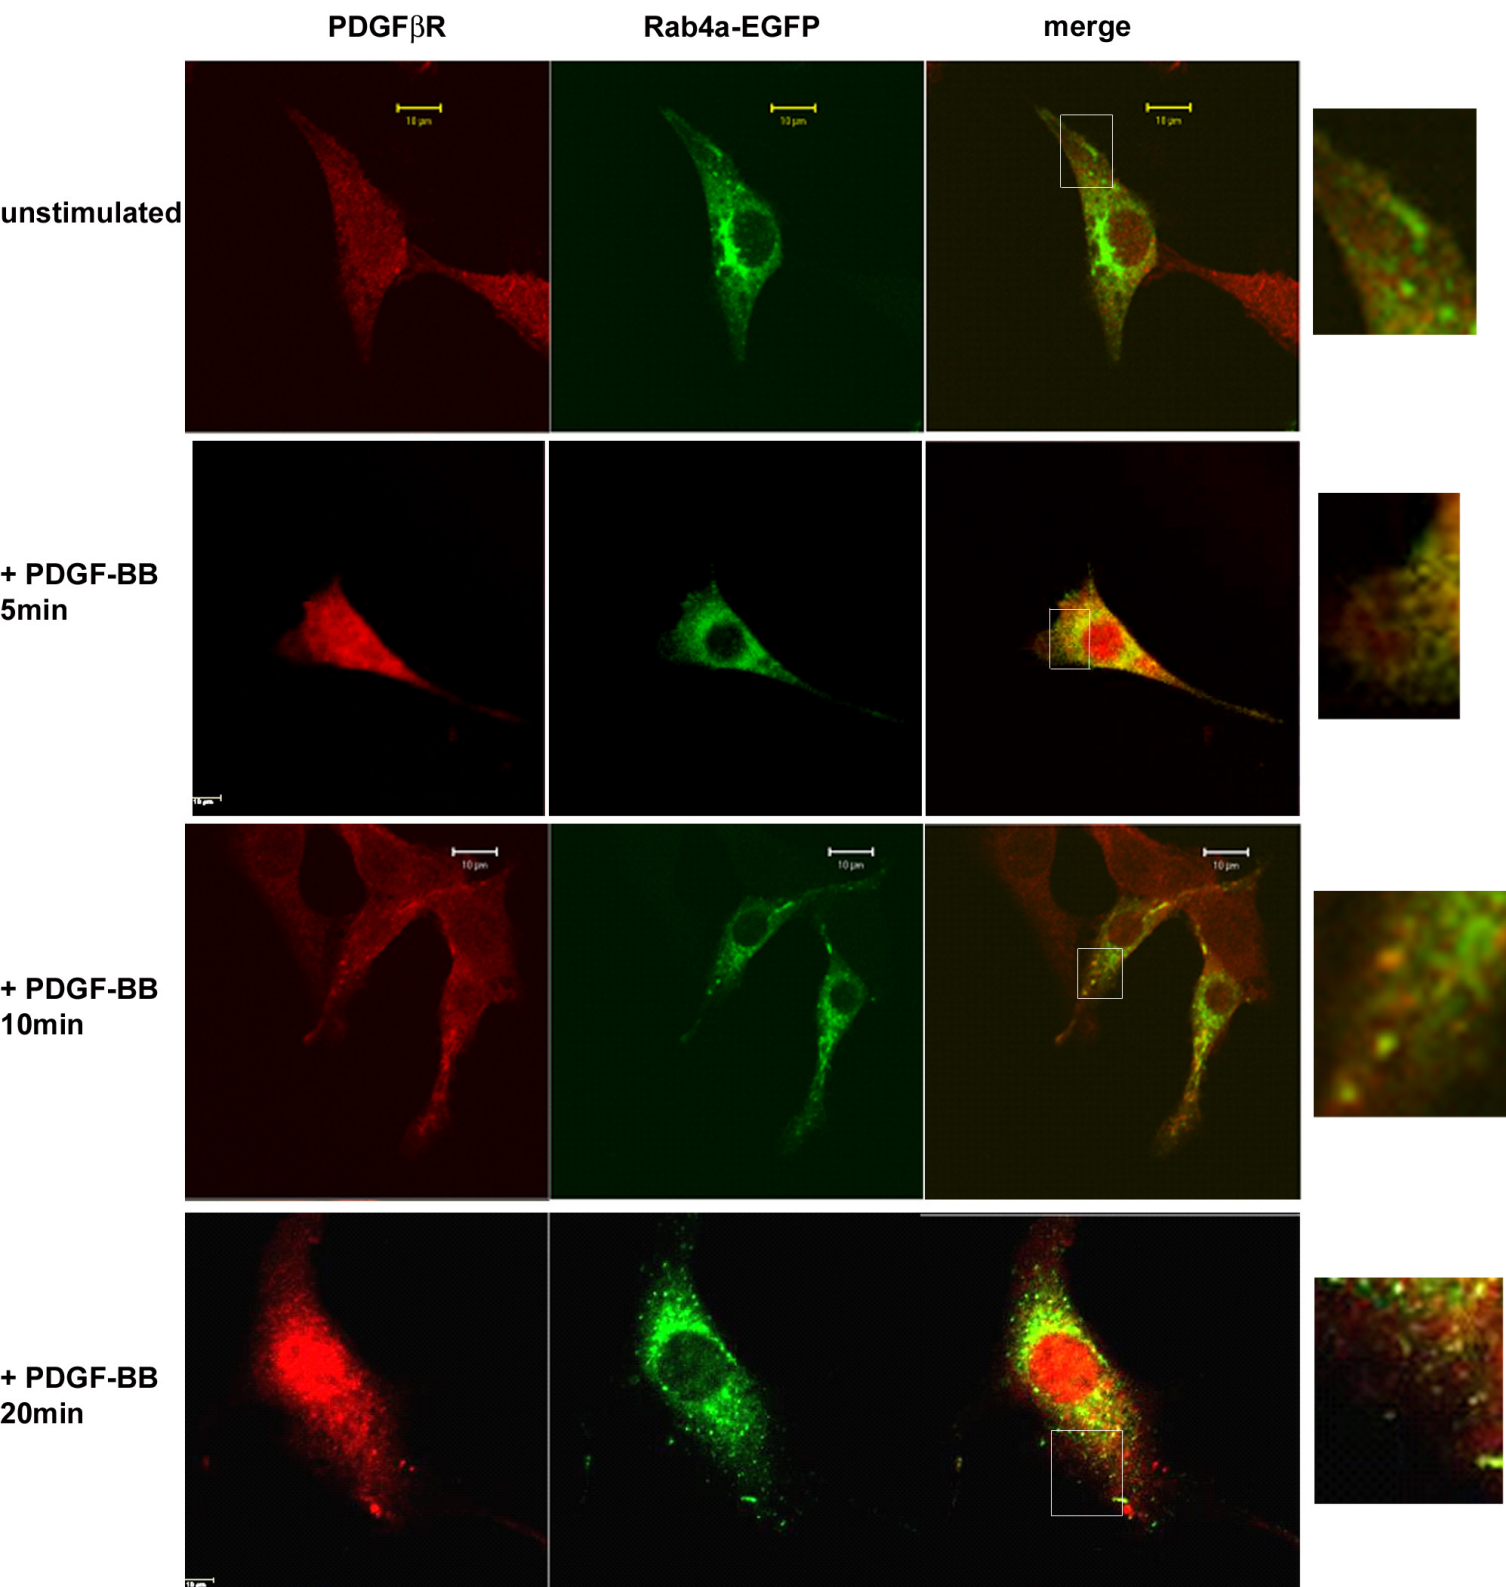

Supplementary Figure S6

Supplement: mbc_E06-04-0306_6.pdf [file mbc_E06-04-0306_6.pdf]
